# Supplementary material
Source: publisher site journal article supplement (https://www.dovepress.com/article/429626)

# Supporting Information

**Temperature-sensitive nanocarbon hydrogel for photothermal therapy of tumors**

Wanlin Tan1,2，Sijie Chen1,2，Yan Xu1,2，Mingyu Chen1,2，Haiqin Liao1,2，Chengcheng Niu1,2*

1 Department of Ultrasound Diagnosis, The Second Xiangya Hospital, Central South University, Changsha, Hunan, China

2 Research Center of Ultrasonography, The Second Xiangya Hospital, Central South University, Changsha, Hunan, China

**Key words：**temperature-sensitive chitosan, carbon nanoparticle suspension, photothermal therapy, hydrogels, antitumor immune response

**Address all correspondence to:** Chengcheng Niu, Department of Ultrasound Diagnosis, The Second Xiangya Hospital, Central South University, Changsha, Hunan,China, 410011; E-mail: [niuchengcheng@csu.edu.cn](mailto:niuchengcheng@csu.edu.cn)

**Photothermal conversion effeiciency calculation**

The photothermal conversion efficiency (η) of CS/GP@CN hydrogel was calculated by the following equations:

Eq. (1)

hS= Eq. (2)

t= Eq. (3)

where *h* is the heat transfer coefficient, S is the surface area of the container, *Tmax* represents the equilibrium temperature, *Tsurr* is the ambient temperature of the environment, Q0 expresses the heat dissipation from the light absorbed by the quartz sample cell (220 mW), I expresses the laser power density (1.0 W/cm2 ); A represents the absorbance of the gel at 808 nm; *ms*and *Cs* are the mass (1.0 g) and heat capacity (4.2J/g) of deionized water as a solvent, respectively; τ stands for the time constant of sample, which can be determined by the linear regression curve of temperature cooling time (t) vs –*ln(θ)* of the black gel.

The absorbance of sample (A(λ)) at the excitation wavelength of 808 nm was measured as 4.6185(the concentration of CNSI: 0.3 mg/mL).

**Images of the tumors of at least 3 of the tumors.**


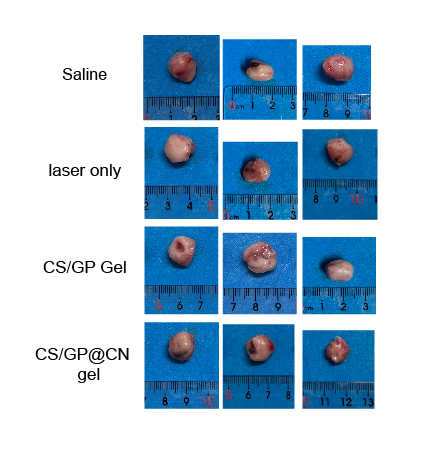

Supplement: Supplementary file 1 [file get_supplementary_file.php]
